# Supplementary material
Source: PubMed Central journal article supplement (PMC1890499)

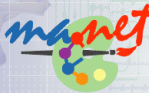

http://manet.uiuc.edu

HOME | ABOUT MANET | METABOLIC MANET | REFERENCES | DATA DOWNLOAD | SEARCH | OTHER RESEARCH | CONTACT US  
Molecular Ancestry Network

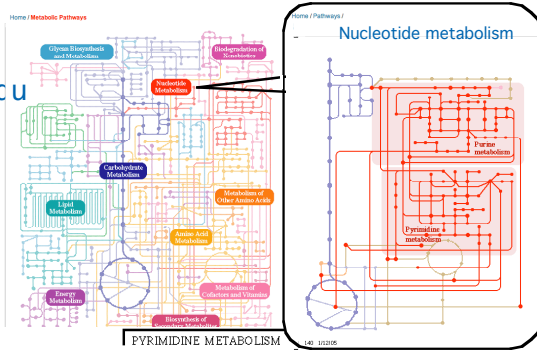

### Pyrimidine metabolism

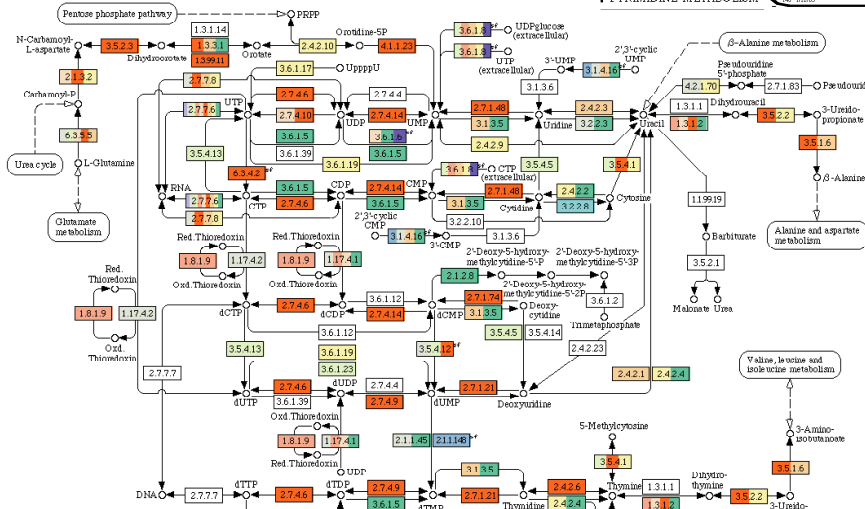

**Nucleotide Metabolism**  
 Purine metabolism  
 Pyrimidine metabolism

| Color        | Older     |
|--------------|-----------|
| Orange       | 0-0.05    |
| Light Orange | 0.05-0.10 |
| Yellow       | 0.10-0.15 |
| Light Green  | 0.15-0.20 |
| Green        | 0.20-0.30 |
| Dark Green   | 0.30-0.40 |
| Blue-Green   | 0.40-0.50 |
| Blue         | 0.50-0.60 |
| Dark Blue    | 0.60-0.70 |
| Black        | 0.70-0.80 |

### Purine metabolism

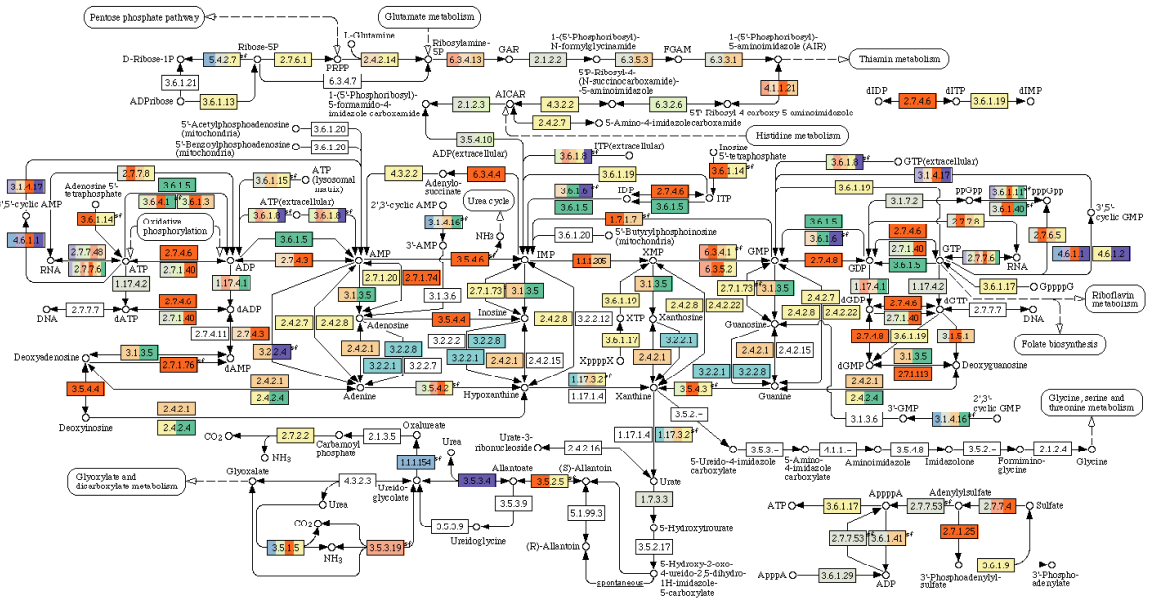

Supplement: pnas_0701214104_2.pdf [file pnas_0701214104_2.pdf]
